# Supplementary material for: Real-world use patterns, effectiveness, and tolerability of sacituzumab govitecan for second-line and later-line treatment of metastatic triple-negative breast cancer in the United States
Source: PubMed Central journal article supplement (PMC11452463; doi:10.1007/s10549-024-07412-9), 2024-06-21

## Supplementary Appendix

### Real-world use patterns, effectiveness, and tolerability of sacituzumab govitecan for second-line and later line treatment of metastatic triple-negative breast cancer in the United States

Kevin Kalinsky, MD · Laura Spring, MD · Clinton Yam, MD · Manali Ajay Bhawe, MD · Ioanna Ntalla, PhD · Catherine Lai, PharmD · Nikoleta Sjekloca, MD, PhD<sup>4</sup> · Brian Stwalley, PharmD, BCGP · Michael Stokes, MPH · Aliko Taylor, PhD · Rita Nanda, MD

#### Corresponding author:

Dr. Kevin Kalinsky

1365 Clifton Road Northeast, Bldg C, Fl 2

Atlanta, GA 30322

Phone: (404) 778-1900

Email: [kevin.michael.kalinsky@emory.edu](mailto:kevin.michael.kalinsky@emory.edu)

**ORCID number:** 0000-0002-1583-3553

This appendix has been provided by the authors to give readers additional information about their work. Supplement to: Kalinsky K., et al. Real-world use patterns, effectiveness, and tolerability of sacituzumab govitecan for second-line and later-line treatment of metastatic triple-negative breast cancer in the United States.

#### Table of Contents

|                                                                                                                                   |          |
|-----------------------------------------------------------------------------------------------------------------------------------|----------|
| <b>Supplementary Appendix</b> .....                                                                                               | <b>1</b> |
| Supplementary Table 1 Baseline demographics and clinical characteristics of patients with mTNBC who received SG in 2L or 3L+..... | <b>2</b> |
| Supplementary Fig. 1 Study design.....                                                                                            | <b>5</b> |

**Supplementary Table 1** Baseline demographics and clinical characteristics of patients with mTNBC who received SG in 2L or 3L+

| <b>Characteristics</b>           | <b>2L<br/><i>n</i> = 77</b> | <b>3L+<br/><i>n</i> = 153</b> |
|----------------------------------|-----------------------------|-------------------------------|
| Age, median (IQR), y             | 59 (46–68)                  | 60 (51–70)                    |
| < 65, No. (%)                    | 48 (62)                     | 91 (59)                       |
| ≥ 65, No. (%)                    | 29 (38)                     | 62 (41)                       |
| Sex, No. (%)                     |                             |                               |
| Female                           | 77 (100)                    | 153 (100)                     |
| Race, No. (%)                    |                             |                               |
| White                            | 48 (62)                     | 98 (64)                       |
| Black                            | 19 (25)                     | 40 (26)                       |
| Asian                            | 4 (5)                       | 5 (3)                         |
| Other/Unknown                    | 6 (8)                       | 10 (7)                        |
| Ethnicity, No. (%)               |                             |                               |
| Hispanic or Latino               | 5 (6)                       | 7 (5)                         |
| Other/Unknown                    | 72 (94)                     | 146 (95)                      |
| Treatment provider type, No. (%) |                             |                               |
| Community                        | 51 (66)                     | 101 (66)                      |
| Academic                         | 23 (30)                     | 40 (26)                       |
| Unknown                          | 3 (4)                       | 12 (8)                        |
| Practice region, No. (%)         |                             |                               |
| Northeast                        | 12 (16)                     | 24 (16)                       |
| South                            | 36 (47)                     | 75 (49)                       |
| Midwest                          | 17 (22)                     | 33 (22)                       |
| West                             | 12 (16)                     | 21 (14)                       |

| Characteristics                                                                  | 2L<br><i>n</i> = 77 | 3L+<br><i>n</i> = 153 |
|----------------------------------------------------------------------------------|---------------------|-----------------------|
| ECOG performance status,* No. (%)                                                |                     |                       |
| 0 or 1                                                                           | 53 (69)             | 109 (71)              |
| ≥ 2                                                                              | 13 (17)             | 27 (18)               |
| Unknown                                                                          | 11 (14)             | 17 (11)               |
| Disease type, No. (%)                                                            |                     |                       |
| Recurrent disease                                                                | 62 (80)             | 108 (71)              |
| De novo metastatic disease                                                       | 9 (12)              | 32 (21)               |
| Unknown                                                                          | 6 (8)               | 13 (8)                |
| Time from mTNBC diagnosis to index date<br>(or enrollment), median (IQR), months |                     |                       |
|                                                                                  | 6 (4.2–10.2)        | 15.5 (10.1–24.9)      |
| Brain metastases at baseline, No (%)                                             |                     |                       |
|                                                                                  | 8 (11)              | 9 (6)                 |
| Visceral metastases at baseline, No. (%)                                         |                     |                       |
|                                                                                  | 60 (78)             | 107 (70)              |
| PD-L1 expression status, No. (%)                                                 |                     |                       |
| PD-L1 positive                                                                   | 8 (10)              | 14 (9)                |
| PD-L1 negative                                                                   | 13 (17)             | 35 (23)               |
| Unknown                                                                          | 56 (73)             | 104 (68)              |
| <i>BRCA1/2</i> mutation status, No. (%)                                          |                     |                       |
| Mutant                                                                           | 8 (10)              | 23 (15)               |
| Wildtype                                                                         | 31 (40)             | 77 (50)               |
| Unknown                                                                          | 38 (49)             | 53 (35)               |

2L second-line, 3L+ third-line and later line, ECOG Eastern Cooperative Oncology Group,

*BRCA1/2* BReast CAncer gene 1/2, ECOG Eastern Cooperative Oncology Group, *IQR*

interquartile range, *mTNBC* metastatic triple-negative breast cancer, *PD-L1* programmed cell death-ligand 1

\*ECOG performance status records during the 6-month period before the index date until 2 months after the index date only were used. If ECOG performance status was not available during the 6-month period prior to the index date, Karnofsky scores were used instead (ECOG performance status 0 or 1 corresponds to Karnofsky scores 70–100 and ECOG performance status  $\geq 2$  corresponds to Karnofsky scores  $\leq 60$ )

†The proportion of patients may add up to greater than 100% as the subgroups are not mutually exclusive

**Supplementary Fig. 1 Study design**

*BC* breast cancer, *dx* diagnosis, *mBC* metastatic breast cancer, *SG* sacituzumab govitecan

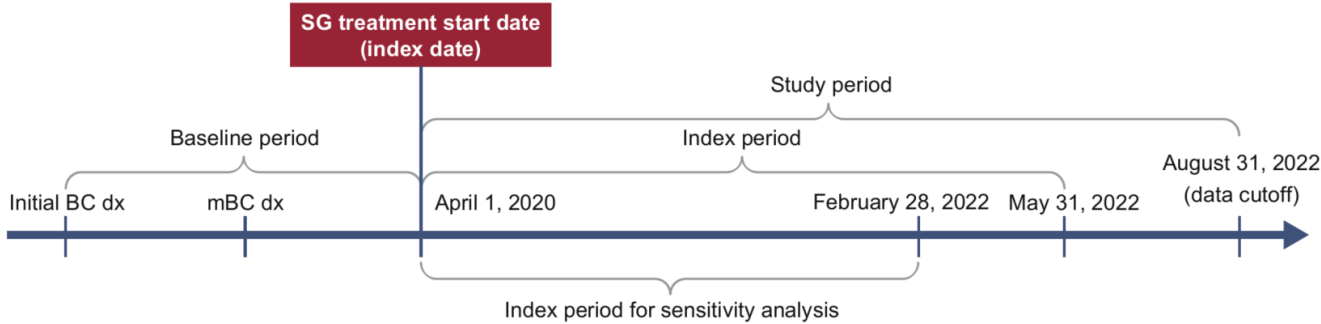

Supplement: 10549_2024_7412_MOESM1_ESM.pdf [file 10549_2024_7412_MOESM1_ESM.pdf]
